# Supplementary material for: Origin and divergence of Afro-Indian Picrodendraceae: linking pollen morphology, dispersal modes, fossil records, molecular dating and paleogeography
Source: Grana. 2019 Jun 10;58(4):227–75. doi: 10.1080/00173134.2019.1594357 (PMC6582451; doi:10.1080/00173134.2019.1594357)
Supplement: Supplemental Material Table S1 [file SGRA_A_1594357_SM9787.xlsx]

## Sheet: Table S1
Table S1. Picrodendraceae and their distibution
Genus	Number of species	Taxon	Occurence	Geographic region
Parodiodendron	1	P. marginivillosum (Speg.) Hunz.	Bolivia to Argentina	Americas
Picrodendron	1	P. baccatum (L.) Krug & Urb.	Caribbean	Americas
Piranhea	4	P. longepediculata Jabl.	Venezuela to N. Brazil	Americas
		P. mexicana (Standl.) Radcl.-Sm.	Mexico	Americas
		P. securinega Radcl.-Sm.	Brazil	Americas
		P. trifoliata Baill	SE. Columbia to Guyana and W. Brazil	Americas
Podocalyx	1	P. loranthoides Klotzsch	W. & S. Venezuela to Peru	Americas
Tetracoccus	4	T. capensis (I.M.Johnst.) Croizat	Mexico (S. Baja California Sur)	Americas
		T. dioicus Parry	S. California to Mexico (Baja California Norte)	Americas
		T. fasciculatus (S.Watson) Croizat	SW. USA to N. Mexico	Americas
		T. ilicifolius Coville & Gilman	SE. California	Americas
Androstachys	1	A.johnsonii Prain	Mozambique to S. Africa, Madagascar	Africa
Aristogeitonia	7	A. gabonica Breteler	Gabon	Africa
		A. limoniifolia Prain	Angola	Africa
		A. lophirifolia Radcl.-Sm.	N. and W. Madagascar	Africa
		A. magnistipula Radcl.-Sm.	Tanzania	Africa
		A. monophylla Airy Shaw	SE. Kenya, E. Tanzania	Africa
		A. perrieri (Leandri) Radcl.-Sm.	N. and W. Madagascar	Africa
		A. uapacifolia Radcl.-Sm.	Madagascar (Toliara Prov.)	Africa
Hyaenanche	1	H. globosa (Gaert.) Lamb. & Vahl	Cape Province in South Africa	Africa
Oldfieldia	4	O. africana Benth. & Hook.f.	W. and WC. tropical Africa	Africa
		O. dactylophylla (Welw. Ex Oliv.) J.Léonard	Tanzania to S. tropical Africa	Africa
		O. macrocarpa J.Léonard	C. and SE. DR Congo	Africa
		O. somalensis (Chiov.) Milne-Redh.	Somalia to Mozambique	Africa
Stachyandra	4	S. imberbis (Air Shaw) Radcl.-Sm.	NW. Madagascar	Africa
		S. merana (Airy Shaw) J.-F.Leroy ex Radcl.-Sm.	NW. Madagascar	Africa
		S. rufibarbis (Airy Shaw) Radcl.-Sm.	NE. Madagascar	Africa
		S. viticifolia (Airy Shaw) Radcl.-Sm.	NW. Madagascar	Africa
Voatamalo	2	V. capuronii Bosser	NE. Madagascar	Africa
		V. eugenioidesCapuron ex Bosser	E. Madagascar	Africa
Mischodon	1	M. zeylanicus Thwaites	Sri Lanka, S. India, Andaman Is.	India
Austrobuxus	22	A. alticola McPherson	NE. New Caledonia	SE Asia / Australasia
		A. brevipesAiry Shaw	E. New Caledonia	SE Asia / Australasia
		A. carunculatus (Baill.) Airy Shaw	New Caledonia	SE Asia / Australasia
		A. celebicus Welzen & P.I.Forst.	Sulawesi	SE Asia / Australasia
		A. clusiaceus (Baill.) Airy Shaw	New Caledonia	SE Asia / Australasia
		A. cracens McPherson	EC. New Caledonia	SE Asia / Australasia
		A. cuneatus (Airy Shaw) Airy Shaw	S. New Caledonia	SE Asia / Australasia
		A. dentatus Welzen & P.I.Forst	W. New Guinea	SE Asia / Australasia
		A. ellipticus McPherson	C. and EC. New Caledonia	SE Asia / Australasia
		A. eugeniifolius (Guillaumin) Airy Shaw	New Caledonia	SE Asia / Australasia
		A. horneanus (S.C.Sm.) Airy Shaw	Fiji	SE Asia / Australasia
		A. huerlimanni Airy Shaw	SE. New Caledonia	SE Asia / Australasia
		A. mandjelicus McPherson	N. New Caledonia	SE Asia / Australasia
		A. megacarpus P.I.Forst	Queensland	SE Asia / Australasia
		A. montis-do Airy Shaw	New Caledonia	SE Asia / Australasia
		A. nitidus Miq.	Pen. Thailand to W. Malesia	SE Asia / Australasia
		A. ovalis Airy Shaw	NW. and C. New Caledonia	SE Asia / Australasia
		A. pauciflorus Airy Shaw	SE. New Caledonia	SE Asia / Australasia
		A. petiolaris Airy Shaw	Papua New Guinea	SE Asia / Australasia
		A. rubiginosus (Guillaumin) Airy Shaw	E. New Caledonia	SE Asia / Australasia
		A. swainii (Beuzev. & C.T.White) Airy Shaw	SE. Queensland, NE. New South Wales	SE Asia / Australasia
		A. vieillardii (Guillaumin) Airy Shaw	NE. New Caledonia	SE Asia / Australasia
Choriceras	2	C. majus Airy Shaw	Queensland	SE Asia / Australasia
		C. tricorne (Benth.) Airy Shaw	New Guinea, N. Northern Territory, NE. Queensland	SE Asia / Australasia
Dissiliaria	6	D. baloghioides F.Muell. ex Baill.	NE. Queensland	SE Asia / Australasia
		D. indistincta P.I.Forst.	NE. Queensland	SE Asia / Australasia
		D. laxinervis Airy Shaw	Queensland	SE Asia / Australasia
		D. muelleri Baill.	Queensland	SE Asia / Australasia
		D. surculosa P.I.Forst.	N. Queensland	SE Asia / Australasia
		D. tuckeri P.I.Forst	N. Queensland	SE Asia / Australasia
Kairothamnus	1	K. phyllanthoides (Airy Shaw) Airy Shaw	Papua New Guinea	SE Asia / Australasia
Longetia	1	L. buxoides Baill	New Caledonia	SE Asia / Australasia
Micrantheum	4	M. demissum F.Muell.	South Australia	SE Asia / Australasia
		M. ericoides Desf.	New South Wales, Queensland	SE Asia / Australasia
		M. hexandrum Hook.f.	Tasmania, E. Victoria, E. New South Wales, SE. Queensland	SE Asia / Australasia
		M. serpentinum Orchard	NW. Tasmania	SE Asia / Australasia
Neoroepera	2	N. banksii Benth	Queensland	SE Asia / Australasia
		N. buxifolia Müll.Arg.	Queensland	SE Asia / Australasia
Petalostigma	5	P. banksii Britten & S.Moore	Northern Territory, Queensland	SE Asia / Australasia
		P. pachyphyllum Airy Shaw	Queensland	SE Asia / Australasia
		P. pubescens Domin	Papua New Guinea, N. Australia to NE. New South Wales	SE Asia / Australasia
		P. quadriloculare F.Muell.	N. Australia	SE Asia / Australasia
		P. triloculare Müll.Arg.	Queensland	SE Asia / Australasia
Pseudanthus	9	P. ballingalliae Halford & R.J.F.Hend.	Queensland	SE Asia / Australasia
		P. divaricatissimus (Müll.Arg.) Benth.	E. New South Wales to E. Tasmania	SE Asia / Australasia
		P. ligulatus Halford & R.J.F.Hend.	Queensland	SE Asia / Australasia
		P. micranthus Benth.	South Australia	SE Asia / Australasia
		P. orbiculatus (Müll.Arg.) Halford & R.J.F.Hend.	EC. New South Wales to Victoria	SE Asia / Australasia
		P. orientalis F.Muell.	E. Australia	SE Asia / Australasia
		P. ovalifolius F.Muell.	SE. New South Wales, Victoria, Tasmania	SE Asia / Australasia
		P. pauciflorus Halford & R.J.F.Hend.	E. Queensland to NE. New South Wales	SE Asia / Australasia
		P. pimeleoides Sieber ex Spreng.	CE. New South Wales	SE Asia / Australasia
Sankowskya	1	S. stipularis P.I.Forst	Queensland	SE Asia / Australasia
Scagea	2	S. depauperata (Baill.) McPherson	SE. New Caledonia	SE Asia / Australasia
		S. oligostemon (Guillaumin) McPherson	New Caledonia	SE Asia / Australasia
Stachystemon	9	S. axillaris A.S.George	W. Western Australia	SE Asia / Australasia
		S. brachyphyllus Müll.Arg.	SW. Australia	SE Asia / Australasia
		S. intricatus Halford & R.J.F.Hend.	WC. Western Australia	SE Asia / Australasia
		S. mucronatus Halford & R.J.F.Hend	SSW. Western Australia	SE Asia / Australasia
		S. nematophorus (F.Muell.) Halford & R.J.F.Hend	W. Western Australia	SE Asia / Australasia
		S. polyandrus (F.Muell.) Benth.	SW. Australia	SE Asia / Australasia
		S. vermicularis Planch	WSW. Western Australia	SE Asia / Australasia
		S. vinosus Halford & R.J.F.Hend.	S. Western Australia	SE Asia / Australasia
		S. virgatus (Klotzsch) Halford & R.J.F.Hend.	SW. Australia	SE Asia / Australasia
Whyanbeelia	1	W. terrae-reginae Airy Shaw & B.Hyland	Queensland	SE Asia / Australasia
Note: Data extracted from WCSP (2018).
